# Supplementary material for: Standardized Pathology Report for Colorectal Cancer, 2nd Edition
Source: PubMed Central journal article supplement — J Pathol Transl Med. 2019 Nov 13;54(1):1–19. doi: 10.4132/jptm.2019.09.28 (PMC6986966; doi:10.4132/jptm.2019.09.28), 2019-11-13
Supplement: jptm-2019-09-28-suppl.pdf [file jptm-2019-09-28-suppl.pdf]

## SUPPLEMENTARY MATERIAL 1

### 대장암 병리보고서 기재사항 표준화 2판

대장암 병리보고서 기재사항 표준화는 대장암의 병리 보고서를 표준화 하기 위해 소화기병리학연구회에서 개발하였으며 대한병리학회지에 2006년 발표되었다[1]. 당시 국내에서 네 번째로 자주 발생하는 암이었던 대장암은 현재 국내에서 두 번째로 자주 발생하는 암이 될 정도로 발생률이 높아졌으며, 병리학적인 진단 기준이나 항목도 많은 변화가 있었다[1,2]. 또한, 표적치료제와 면역치료제가 대장암에 도입이 되면서 대장암과 관련된 분자병리 검사 또한 대장암의 치료에 필요한 항목이 됨에 따라, 기존의 기재사항 표준화 보고서로는 변화하는 대장암 병리 진단을 모두 반영하기 어렵게 되었다.

대한병리학회 소화기병리학 연구회에서는 많은 병리의사들이 사용하고 있는 대장암 병리보고서 기재사항 표준화의 개정에 대한 요구가 많다고 판단하였고, 2017년 9월부터 2018년 10월까지 개정작업을 위한 소위원회를 구성하여 수차례의 논의를 거친 후 <대장암 병리보고서 기재사항 표준화 2판>을 완성하였다. 기존의 표준화 지침을 기반으로, 미국병리학회 프로토콜, American Joint Committee on Cancer (AJCC) 8판, World Health Organization (WHO) 분류 5판, 종양학 국제 질병 분류(International Classification of Diseases for Oncology) 등을 참고하였다[3-6].

표준화된 대장암 병리 보고서의 목적은 대장암 환자들의 표준화된 진단과 진료가 가능하게 하는 것이고, 국내 다기관 임상시험이나 국제 연구에서도 동일한 환자군을 선택하고 정보를 교환하는 데 도움을 줄 수 있도록 하는 것이다. 현재까지의 최신지견을 모두 수록하면 좋겠지만 이럴 경우 병리의사의 업무량 증가를 가져오게 되고, 현행 의료체계에서는 병리진단의 세부적인 업무량 증가가 의료수가에 충분히 반영되기 어려워 비실용적인 표준화 보고서가 될 수 있다고 보았다. 따라서, 이전 보고서와 같이 대장암의 병리 진단에서 암의 기본적인 병리학적 소견과 예후 판정에 필요한 부분들은 표준 기재사항으로 분류하였고, 그 외에 예후 관련 인자들이나 보조 치료에 필요한 사항들은 선택 기재사항으로 분류하여, 각 기관에서는 기관의 특성에 맞추어서 내용들을 선택하여 사용할 수 있도록 하였다. 초판과 마찬가지로 병리보고서의 국제화를 위하여 영어로 기재하도록 하였으며, 앞으로 각 항목의 판독 기준이나 분류법이 바뀌더라도 추후에 추적할 수 있도록 약자나 숫자로 된 분류법의 사용을 제한하였다.

대한병리학회지가 *Journal of Pathology and Translational Medicine*의 영문 논문으로 바뀌게 되면서 게재하는 보고서는 영문으로 작성하게 되었으나, 병리의사들이 쉽게 이해하고 사용할 수 있도록 하기 위해서 한글판을 따로 작성하였다.

#### 절제 대장의 표준 기재사항

종양이 두 개 이상 있는 경우에는 가장 침윤이 깊은 종양부터 각각의 종양에 대한 항목들을 적되, 국소림프절전이(regional lymph node metastasis), 연관소견(associated findings), 독립병변(separate lesions) 항목은 가장 깊은 종양에만 적는다.

---

#### Specimen type

- Right hemicolectomy
  - Transverse hemicolectomy
  - Left hemicolectomy
  - Anterior resection
  - Low anterior resection
  - Abdominoperineal resection
  - Subtotal/total colectomy
  - Total proctocolectomy
  - Transanal excision
  - Endoscopic mucosal resection
  - Other: (specify: \_\_\_\_\_ )
-

해설: 본 기재사항은 수술로 절제한 대장/직장암뿐만 아니라 내시경 절제 혹은 경향문절제 표본에서도 동일하게 적용할 수 있도록 하였다.

---

### Histopathologic type of invasive carcinoma

- Adenocarcinoma, NOS
    - low-grade (well differentiated and moderately differentiated)
    - high-grade (poorly differentiated)
  - Mucinous adenocarcinoma
  - Signet ring cell carcinoma
  - Medullary carcinoma
  - Serrated adenocarcinoma
  - Micropapillary adenocarcinoma
  - Squamous cell (epidermoid) carcinoma (excluding upwardly spreading anal tumors)
  - Adenosquamous carcinoma
  - Small cell neuroendocrine carcinoma
  - Large cell neuroendocrine carcinoma
  - Mixed neuroendocrine-non-neuroendocrine neoplasm
  - Undifferentiated carcinoma
  - Other: (specify: \_\_\_\_\_ )
- 

해설: 종양의 조직학적 유형은 WHO 분류 5판을 기본적으로 따른다[5]. 비록 거의 대부분의 대장 및 직장암은 샘암종(adenocarcinoma, not otherwise specified [NOS])이지만, 다른 조직학적 이형이 섞여 있는 경우에 대해 따로 언급하는 것을 권장한다; 이는 어떤 조직학적 이형은 특이한 분자유전학적 특징과 환자의 예후와 관련 있을 수 있기 때문이다[5,7]. WHO 분류와 AJCC 8판에 기술된 대장 및 직장암의 대표적인 조직학적 유형은 위의 표와 같다[4,5].

점액 샘암종(mucinous adenocarcinoma)과 인환세포암종(signet ring cell carcinoma)의 경우 세포 외 점액과 인환세포가 각각 종양의 50% 를 초과할 때 진단할 수 있다. 만약 50% 이하인 경우 주조직학적 유형과 함께 점액과 인환세포의 비율을 기술해 주는 것을 권장한다[5]. 주의할 점은, 수술전 전보조치료를 받은 경우 점액을 생성할 수 있으므로, 이런 경우 수술 전 병리검체의 진단을 기술하는 것을 권장한다[8]. 수질암종(medullary carcinoma)은 드문 조직학적 유형으로 미분화암종(undifferentiated carcinoma)과의 감별을 요하고, 암세포내 림프구나 호중구 침윤이 현저하며 그 사이사이 암세포가 고형성 또는 판(sheet)형태로 보이는 경우 진단한다[5,7]. 수질암종의 종양 세포들은 보통 호산성의 풍부한 세포질과 수포성 핵, 저명한 핵소체를 보여준다[5]. 다른 드문 조직학적 유형인 미세유두 샘암종(micropapillary adenocarcinoma)은 작은 종양세포 군집 주위로 간질의 빈 공간이 존재하여 림프관 또는 미세혈관을 침윤한 것처럼 보이는 경우 진단할 수 있다[9-11]. 미세유두 선암종의 경우 림프절 전이의 위험도가 높은 것으로 알려져 있으며 림프관 침윤이나 혈관 침윤과 같은 나쁜 예후를 보이는 인자들이 흔히 관찰된다[9-13]. 하지만, 미세유두의 특징만 있는 대장 및 직장암은 아주 극히 드물며, 하나의 다른 조직유형에서 미세유두의 이형이 공존하는 경우가 대부분이다[5,14]. WHO 분류에서는 미세유두 아형이 전체 종양의 5% 이상일 경우 미세유두 선암종으로 진단하도록 되어 있으나, 아직까지 미세유두 샘암종의 진단을 위한 표준화된 미세유두 이형의 비율은 논란의 여지가 있어서, 본 소위원회에서는 의견 일치에 도달하지 못 하였다[5]. 톱니형 샘암종(serrated adenocarcinoma)은 현저한 상피의 톱니 모양을 가진 톱니모양병변과 유사한 형태를 가지는 샘암종으로, 낮은 핵:세포질 비율을 가지며 붉은 풍부한 세포질과 수포성 핵을 보이는 특징을 가지고 있다[5,15,16]. 일부 연구에서 톱니형 샘암종의 진단 기준을 제시하고 있으나[17], 아직까지 톱니형 샘암종의 진단 기준에 대한 일치된 기준은 제시되지 않았다. 샘편평세포암종(adenosquamous carcinoma)은 분명한 편

평상피 암종부분이 확실히 보여야 진단할 수 있다. WHO 분류에서는 식도와 위의 종양에서는 샘암종과 편평세포암종 분화를 보이는 부분이 각각 20%와 25% 이상일 경우 샘편평세포암종을 진단하도록 하고 있다[5]. 그러나 대장에서는 이 비율이 제시되지 않아 본 위원회에서는 이전 보고서의 내용과 같이 편평세포암종 부분이 “more than occasional small foci” 일 때 샘편평세포암종을 진단하도록 권고한다[1]. 미분화암종은 형태학적 소견과 면역염색, 분자병리 소견을 종합하여도 상피성 분화 외에는 특정 분화를 보이지 않을 경우 진단한다[5]. 샘종양 샘암종(adenoma-like adenocarcinoma)은 용모샘암종(villous adenocarcinoma)라고도 불리우며, WHO 5판에 대장암의 조직학적 아형으로 처음 도입되었다[5]. 샘종양 샘암종은 종양의 침윤성 부위의 50% 이상이 용모형 샘종같은 좋은 분화를 보이는 암종으로, 팽창성 경계(pushing border)를 가지고 섬유조직형성(desmoplasia)이 거의 관찰되지 않는다[5]. 샘종양 샘암종을 대장암의 특정 아형으로 분류해야 하는지는 아직 논란이 있기 때문에 본 보고서에서 아형으로 추가하지 않았다.

종양의 분화도는 샘 구조를 만드는 면적으로 결정하며, 이러한 종양의 분화도는 샘암종(adenocarcinoma, NOS)의 조직학적 유형을 보이는 경우에 적용한다[7]. 이는 다른 조직학적 유형은 그들 고유의 예후의 특징을 가지고 있기 때문이다[7]. 최근 점액 샘암종 또한 분화도가 예후 결정에 중요하다는 것이 밝혀지고 있으나, 분화도를 결정하기 위한 표준화된 기준은 제시되지 않고 있다[5,18]. 종양의 분화도는 저등급(low-grade)와 고등급(high-grade)의 두 단계로 나누는 것을 권장한다[5]. 기존의 분화도를 나누는 기준은 선구조를 만드는 면적이 95%를 초과하면 고분화형 샘암종, 50%–95%면 중분화형 샘암종, 50% 미만이면 저분화형으로 3단계였으나, 두 단계 분화 등급에서 고분화형과 중분화형은 저등급, 저분화형은 고등급으로 분류한다[5,19].

#### Location

- Cecum
- Ascending colon
- Hepatic flexure
- Transverse colon
- Splenic flexure
- Descending colon
- Sigmoid colon
- Rectosigmoid junction
- Rectum
- Other: (specify: \_\_\_\_\_ )

해설: 위치는 ICD-O의 분류를 따른다[6]. 맹장의 길이는 대략 6 cm이고 에스자 결장의 길이는 40 cm이다. 직장은 항문연의 12–15 cm 상방부터 치상선의 1–2 cm 상방까지이다. 직장의 상부 1/3은 앞쪽과 양측면이 복막에 둘러싸여 있으며, 직장의 중간 1/3은 앞쪽이 복막에 둘러싸여 있다. 직장의 하부 1/3은 복막에 둘러싸인 부분이 없다. 이번 개정에서 중복병변(overlapping lesion) 문항은 실제로 사용이 많지 않아 삭제하였다. 종양이 대장의 두 부분(subsite) 이상을 침범하였을 때는 종양의 중심과 더 많이 침범한 부위를 판단하여 분류한다.

#### Gross type

- Fungating/polypoid
- Ulcerofungating
- Ulceroinfiltrative
- Infiltrative
- Unclassifiable

해설: 표재형(superficial type)은 현미경에서만 관찰할 수 있는 침윤 정도의 깊이로 정의되기 때문에 사용하기를 권고하지 않는다. 표재형으로 기술되던 폴립들 대부분이 용기형/폴립형(fungating/polypoid type)으로 분류될 수 있다. 만약 표재형을 쓴다면, 일본의 육안 분류와 같이 점막이나 점막하층에 국한되어 있고, 종양의 두께가 주변 점막의 2배 이하일 경우에만 쓰도록 한다. 나머지 분류는 이전 판과 같이 용기형/폴립형, 궤양용기형(ulcerofungating), 궤양침윤형(ulceroinfiltrative), 침윤형(infiltrative), 미분류형(unclassifiable)이며, 위암의 보르만(Borrmann) 분류법과 동일하다.

---

### Tumor size

\_\_\_\_\_ × \_\_\_\_\_ × \_\_\_\_\_ cm

---

해설: 종양의 크기는 가장 긴 축의 길이와 이에 수직인 길이의 곱으로 표시한다. 종양의 깊이는 가장 두꺼운 곳에서 현미경으로 측정한다.

---

### Depth of invasion

- Intramucosal carcinoma (pTis)
  - Tumor invades the submucosa (pT1)
  - Tumor invades the muscularis propria (pT2)
  - Tumor invades through the muscularis propria into pericorectal tissue (pT3)
  - Tumor invades through the visceral peritoneum (pT4a)
  - Tumor directly invades or adheres to adjacent organs or structures (pT4b)
- 

해설: AJCC 8판에 따르면 기저막 내부에 국한된 상피내암종(intraepithelial carcinoma)은 고등급이형성(high grade dysplasia)과 동의어로 분류되며 pTis에 포함되지 않는 것으로 변경되었다. 고유판(lamina propria)을 침윤하나 점막근육(muscularis mucosae)을 넘지 않는 점막내암종(intramucosal carcinoma)이 전이 위험이 없는 암종인 pTis에 해당된다[4]. 점막내암종은 (1) 단일 세포나 세포군집이 기저막과열을 동반하며 고유판 침윤을 보일 때, (2) 섬유조직형성(desmoplasia)이나 염증세포침윤을 보이는 고유판 변화가 있을 때, (3) 명백한 역형성을 가지는 세포가 심한 샘구조 이상(marked glandular crowding, excessive branching and budding)을 보여서 기저막과열이 의심되는 경우로 진단할 수 있다(Fig. 1A, B) [20]. 이에 비하여 고등급이형성은 세포핵이 비정형을 보이면서 복잡한 샘구조이상(intraluminal cribriforming or necrosis, back-to-back fusion of multiple glands)이 있을 때 진단하며, 복잡한 샘구조이상 없이 중첩된 핵이 보일 때는 세포길이에 대한 비율에 상관없이 저등급이형성(low grade dysplasia)으로 분류한다(Fig. 1C) (pre-existing adenoma 참조). AJCC 8판에서는 대장결장의 상피내암종을 고등급이형성과 동의어로 설명하면서 pTis에서 제외하였지만, AJCC 7판 이전에는 상피내암종이 pTis로 분류되어 있었고, 대장암을 제외한 다른 소화기 암종에서는 여전히 pTis로 진단되고 있다[4]. 따라서 본 연구회에서는 혼동을 줄이기 위해 상피내암종이나 제자리샘암종(adenocarcinoma in situ)의 사용을 최소화하고, 고등급이형성과 점막내암종의 이분화된 진단을 사용하기를 권장한다.

궤양에 의해 근육층이 소실된 부위에 종양이 있으면 장막하 침윤 pT3로 판정한다. 만일 종양과 장막의 거리가 1 mm 미만이고 염증이 동반되어 있으면 연속절편이나 추가 블록을 제작하여 주의깊게 검사한 후에도 장막 침범이 없으면 pT3로 한다 [4,21]. 다른 장기와 동일하게 pT4는 pT4a와 pT4b로 구분한다. 암세포가 복강으로 노출되어 있거나 암세포가 장막 면에 붙어 있으면서 증피세포의 증식이나 염증 등의 반응을 동반하는 경우 pT4a로 분류한다. 그러나 상행 및 하행 결장의 후부와 하부 직장과 같이 장막이 없는 부위에서는 pT4a를 적용할 수 없다. 암세포가 장막을 뚫고 인접한 장기를 침윤하였을 때는 pT4b로 구분하고 침범 장기를 기록한다. 직장암의 경우, 바깥항문조임근(external sphincter muscle) 침범은 pT3로 분류하지만 항문을

림근(levator ani muscle) 침범이 있으면 pT4b로 한다.

림프관 혹은 정맥혈관 내에 국한된 암세포는 침윤 깊이에 해당하지 않으며 별도로 괄호안에 기록한다(invades proper muscle [involvement of subserosa by lymphatic emboli]). 주변점막이나 점막하층에 다수의 병변으로 나타나는 건너뛰 전이(skip metastasis)는 원격전이로 분류하지 않는다. 종양 주변에 농양이 동반되는 경우나 수술 전 항암치료 후 암세포 비동반(암세포가 없는) 점액 응덩이가 관찰되는 경우는 예후 영향인자가 아닌 것으로 알려져 있으며, 이러한 조직학적 소견은 침윤 깊이를 평가하는데 고려대상이 아니다[22-24].

---

[Endoscopic excision (Endoscopic submucosal dissection/polypectomy) or transanal excision]

- Tumor invades the lamina propria with no extension through muscularis mucosae (pTis)
- Tumor invades the submucosa (pT1)

For sessile lesion:

Distance of tumor from muscularis mucosae: \_\_\_\_\_ mm

For pedunculated lesion:

Haggitt level (head, neck, stalk, beyond stalk)

Distance of tumor invasion in stalk: \_\_\_\_\_ mm

---

해설: 악성 폴립(malignant polyp)은 육안적으로 샘종성 폴립모양이지만, 샘암종 세포가 점막하층 이상을 침범한 폴립을 일컫는 것이며, 내시경적으로 절제된 폴립에서 (1) 고등급암(poorly differentiated carcinoma)의 존재, (2) 절제연과의 거리가 1 mm 이하, (3) 림프관/혈관 침범이 있는 경우 추가적인 수술이 요구된다. 점막하층 침윤 깊이도 림프절 전이의 위험을 예측할 수 있는 소견으로써 무경성 폴립에서 암의 침윤 깊이가 1 mm (1,000 μm) 이상일 경우 림프절 전이 위험이 높다고 알려져 있다[25,26].

본 소위원회에서는 점막하층 침윤 깊이의 측정오차를 줄이기 위하여 측정 방법에 대해 논의를 하였다. 유경성 폴립과 무경성 폴립으로 구분하여, 유경성 폴립은 점막하층 침윤을 Haggitt level (head, neck, stalk, beyond stalk)로 구분하며[27,28], 폴립의 목 부위(level 2)가 침윤을 측정하는 기준이 된다(Fig. 2A, B). 무경성 폴립의 점막하층 침윤에서는 점막근층이 보존된 경우, 점막근층의 가장 하단 부위로부터 수직으로 측정한다. 점막근층이 불확실한 경우에는 주변 점막근층으로부터 자연스럽게 연결되는 가상의 선을 그어 측정하도록 권장한다(Fig. 2C, D)[29].

---

**Resection margin**

Proximal margin

- Free from carcinoma
- Involved by carcinoma

Distal margin

- Free from carcinoma
- Involved by carcinoma

Circumferential margin (rectum only)

- Free from carcinoma
- Involved by carcinoma

Safety margin: proximal \_\_\_\_\_ cm, distal \_\_\_\_\_ cm, circumferential \_\_\_\_\_ cm

---

해설: 근위와 원위 절제연으로부터의 거리(safety margin)는 육안적으로 암종의 가장자리에서 가장 가까운 절제연까지의 길이를 cm 단위로 표기한다. 직장암의 경우 환상절제연 평가는 장막으로 덮여 있지 않은 직장간막 절단면을 대상으로 하는 것이며, 장막으로 덮여 있는 표면은 환상절제연이 아니므로 주의한다. 절제된 검체의 환상절제연을 확인하여 잉크 등으로 표시한 후 종양이 가장 깊이 침윤한 곳을 포함한 절편을 채취한다. 현미경적으로 암종 세포의 침범이 있는지 여부를 평가하여 표기한다. 환상절제연과 암종(림프절, 신경, 혈관내 종양 포함) 사이의 거리가 0.1 cm 이하인 경우 절제연을 양성으로 표기하고, 0.1 cm를 초과하는 경우에 음성으로 표기한다[3,4]. 직장암 외의 대장암은 환상절제연 평가가 필요하다고 판단한 경우에만 표기한다.

---

[Endoscopic excision (Endoscopic mucosal resection/ submucosal dissection/polypectomy) or transanal excision]

Deep margin

- Free from carcinoma
- Involved by carcinoma
- Not applicable

Horizontal margin

- Free from carcinoma
- Involved by carcinoma
- Involved by adenoma: (specify grade: \_\_\_\_\_)
- Not applicable

Safety margin: deep \_\_\_\_\_ cm, horizontal \_\_\_\_\_ cm

---

해설: 내시경절제(폴립절제, 점막절제, 점막하층박리) 및 항문경유절제를 포함한다. 현미경적으로 심부절제연(deep margin)과 점막절제연(horizontal margin)을 검사하여 암종의 침범이 있는 경우 양성, 없는 경우 음성으로 표기한다. 점막절제연은 샘종의 침범 여부를 표기한다. 조각절제된 검체 등 절제연의 평가가 불가능한 경우 평가할 수 없음으로 표기한다.

---

Regional lymph node metastasis

- No metastasis in all \_\_\_\_\_ regional lymph nodes (pN0)
  - Metastasis to \_\_\_\_\_ out of \_\_\_\_\_ regional lymph nodes
- pN \_\_\_\_\_
- 

해설: 국소 림프절 전이의 진단은 원칙적으로 AJCC 8판을 따른다[4]. 정확한 예후 판정을 위해 12개 이상의 림프절을 검사하기를 권장하지만, 그보다 적은 수의 림프절을 검사하였다더라도 모든 림프절에 전이가 없다면 pN0로 판정할 수 있다. 수술 전 항암, 방사선 치료를 한 경우에는 박리되는 림프절 수가 적을 수 있다. 국소 림프절 이외의 림프절로의 전이는 원격 전이로 판정하고, 림프절 전이 숫자에는 포함시키지 않아야 한다.

림프절로 전이된 종양의 크기가 2 mm보다 작고 0.2 mm 이상인 경우 미세전이(micrometastasis)로 분류하고, 0.2 mm보다 작은 경우 고립종양세포(isolated tumor cell)로 분류한다[4]. 미세전이가 있는 림프절은 림프절 전이가 있는 것으로 판단한다. 고립종양세포는 일부 병기에서 나쁜 예후와 관련이 있음이 알려져 있지만 AJCC 8판에서는 pN0로 평가하도록 권장하고 있다[4]. 그러나, 이 부분은 논쟁의 여지가 있고, 실제 진단에서도 적용하기 어려운 점이 있다. 그래서, 우리는 기재사항 표준화 1판에서와 같이 H&E 슬라이드에서 발견된다면, 전이 종양의 크기가 0.2 mm보다 작은 고립종양세포도 림프절 전이로 판단하고 전이 림프절 숫자에 포함하기를 권장한다.

종양침전물(tumor deposit)은 장막하층, 장간막, 직장주변 조직에서 원발종양과 분리되어 관찰되는 림프절, 혈관, 신경 침범이 아닌 종양 결절을 의미하며, 크기나 모양, 경계의 형태에 관련 없이 판단한다[4]. 이런 종양 결절 내부에 혈관 또는 신경 구조물이 관찰된다면 혈관 침범이나 신경 침범으로 판단해야 한다. 탄력섬유 특수염색(elastic stain)이나 smooth muscle actin 등의 면역조직화학 염색이 감별에 도움이 될 수 있다. 종양의 침윤 깊이에 상관없이, 림프절 전이가 없고 종양침전물이 있을 경우에는 pN1c로 진단한다. 림프절 전이가 있는 경우 종양침전물은 림프절 개수에 포함하지 않는다. 수술 전 항암, 방사선 치료를 한 경우 종양퇴행에 의한 변화로 장막하 혹은 직장주변 조직의 종양이 종양침전물처럼 보이는 경우가 있으니 주의해야 한다.

---

#### Lymphatic (small vessel) invasion

- Not identified
- Present

#### Venous invasion

- Not identified
- Present
  - Intramural
  - Extramural

---

해설: 림프관침범(lymphatic invasion)은 림프절 전이를 예측할 수 있는 인자이고[26], 정맥침범(venous invasion)은 잘 알려진 독립적 예후인자이다[30]. H&E 염색에서 림프관(lymphatic vessel)은 뒤당김인공물(retraction artifact)과 감별이 어려울 수 있고, 이 경우 내피세포의 확인을 위해 D2-40 면역조직화학염색(immunohistochemistry)을 추가로 시행할 수 있다(Fig 3A). H&E 염색으로 림프관과 혈관을 구별할 수 없는 경우가 흔하기 때문에 림프관, 모세혈관 및 모세혈관이후 세정맥과 같이 작은 맥관을 침범한 경우는 림프관침범으로(Fig 3B), 근육층 또는 탄력판이 있는 큰 맥관을 침범한 경우는 정맥침범으로 간주한다[31](Fig. 3C). 침범된 맥관 내에 적혈구가 관찰되더라도 맥관의 크기가 작은맥관(small vessel)이면 림프관침범으로 판정한다. 필요한 경우 탄력섬유를 확인하기 위한 특수염색이나 CD31, D2-40, smooth muscle actin과 같은 면역조직화학염색을 추가로 시행할 수 있다. 정맥침범중 벽외 정맥 침범은 대장직장암의 불량한 예후 및 간 전이와 연관된 독립적 예후 인자이므로 따로 표기하는 것을 권장한다[30].

---

#### Perineural invasion

- Not identified
- Present

---

해설: 신경침범(perineural invasion)은 대장직장암에서 나쁜 예후를 나타내는 독립적인 예후인자로 알려져 있다[32]. 이는 병리보고서의 표준기재 사항이고 H&E 염색 슬라이드에서 평가한다. 신경침범의 기준은 명확하지 않으나, 종양세포가 신경 집(nerve sheath) 세 층 중 어느 하나라도 침범하거나 신경 둘레를 침범한 경우 신경침범으로 판정한다[33]. 종양세포가 신경 내에 존재하는 경우(intraneural invasion)도 신경침범에 포함시켜 기록한다.

---

### Pre-existing adenoma

- Absent
  - Tubular/Tubulovillous/Villous adenoma
    - Low grade dysplasia/High grade dysplasia
  - Sessile serrated lesion (Sessile serrated adenoma/polyp)
  - Sessile serrated lesion (Sessile serrated adenoma/polyp) with dysplasia
  - Traditional serrated adenoma
  - Other (specify: \_\_\_\_\_)
- 

해설: 대장암 전구병변의 두 가지 주요 카테고리에는 전형적 샘종(conventional adenoma)과 톱니모양병변(serrated lesion)이 있다[34]. WHO 분류에 따르면, 전형적 샘종은 형태학적으로 관형(tubular) 및 용모형(villous) 요소의 구성 비율에 따라 관형(용모형 비율 25% 미만), 관용모형(용모형 비율 25%에서 75% 사이), 용모형(용모형 비율 75% 초과)의 3가지 샘종으로 나눌 수 있다[5]. 정의에 따르면, 모든 전형적 샘종은 상피의 이형성(dysplasia)을 나타내고, 이러한 이형성은 저등급(low-grade) 또는 고등급(high-grade)으로 평가될 수 있다[5]. 고등급이형성은 복잡한 샘구조 이상(intraluminal cribriforming or necrosis, back-to-back fusion of multiple glands), 핵의 다형성, 핵의 극성 소실, 핵 대 세포질 비율의 증가 등을 특징으로 한다(Fig 4A). 저등급 이형성의 특징으로는 비복잡성 구조, 층화(stratification), 길어진 모양의 과염성 핵, 유지된 세포 극성 등이 있다(Fig 4B). 고등급이형성과 저등급이형성의 감별을 위해 가장 중요하고 필수적인 부분은 고유층의 침범이 없는 복잡한 샘구조 이상으로, 복잡한 구조 이상 없이 세포학적 이상만 있을 경우는 고등급이형성으로 진단하지 않는다. 이전 판에서는 세포학적 이상이 있을 경우에도 고등급이형성으로 진단하도록 권고하였고, 세 개 이상의 선구조가 고등급 소견을 보일 경우를 고등급이형성의 진단 기준으로 하였다. 이를 따르면 세포학적 이상만으로 고등급이형성을 진단하는 경우가 많아지고, 고등급이형성의 진단에 가장 중요한 복잡한 샘구조 이상이 있음에도 불구하고 저등급이형성으로 진단하는 경우가 있었기 때문에, 복잡한 샘구조 이상을 고등급이형성의 필수 요소로 기술하였다. 하나의 전형적 샘종에서 고등급과 저등급 이형성이 함께 존재할 때에는 고등급 이형성으로 진단한다[1].

WHO 분류에 따르면 톱니모양병변은 과증식 용종(hyperplastic polyp), 무경성톱니모양병변(sessile serrated lesion, SSL, 기존 용어 sessile serrated adenoma/polyp), 전통톱니모양샘종(traditional serrated adenoma)의 3가지로 나눌 수 있다[5]. 그러나 톱니모양병변의 분류법 및 진단기준은 계속 변화해 왔다[35,36]. 가장 최근의 2019년 WHO 분류법[5], 2012년 미국 전문가 패널 권고사항[35] 및 2015년 영국의 가이드라인[36]을 종합적으로 고찰한 결과, 우리는 대장암의 기 존재 샘종(pre-existing adenoma)으로서 톱니모양병변을 다음 3가지 용어 중 하나로 진단할 것을 권고한다: (1) 이형성이 없는 무경성톱니모양병변(SSL), (2) 이형성이 있는 무경성톱니모양병변(SSL with dysplasia, SSLD), (3) 전통톱니모양샘종. 과증식 용종은 비전암성 양성 병변으로 취급되므로 대장암의 기 존재 샘종으로서의 톱니모양병변 범주에는 포함하지 않도록 한다.

모든 무경성톱니모양병변은 전암성 병변으로 취급되며, 형태학적 이형성이 있을 수도 있고 없을 수도 있다. 이형성이 없는 무경성톱니모양병변과 비교하여 이형성이 있는 무경성톱니모양병변은 암종으로 진행할 위험도가 높은 것으로 알려져 있다. 무경성톱니모양병변은 기저부까지 관찰되는 움(crypt) 내강의 톱니바퀴 모양(serration), 움의 수평방향 성장, 비대칭적 증식과 움의 바닥부분이 늘어나거나 가지치는 양상을 특징으로 한다(Fig. 4C). 무경성톱니모양병변은 전형적인 구조 이상을 보이는 움이 하나만 존재해도 진단 할 수 있다[5,35]. 무경성톱니모양병변의 이형성은 다양한 형태로 나타날 수 있으며, 하나의 병변에서 여러가지의 형태를 보이기도 한다. 구조적으로 용모형 변화, 움 길이의 연장, 움 밀도의 증가, 격자형성, 움 내 톱니의 감소 등을 보일 수 있고, 세포학적으로 전형적 샘종과 유사한 핵을 보이거나(장형 이형성: intestinal dysplasia) 원형의 핵 소체가 뚜렷한 핵을 보일 수 있다(톱니형 이형성: serrated dysplasia)[5]. 무경성톱니모양병변의 이형성에서는 MLH1의 발현 소실이 관찰되는 경우가 잦기 때문에, MLH1 면역염색이 무경성톱니모양병변의 이형성을 진단하는 데 도움이 될 수도 있다[37]. 무경성톱니모양병변의 이형성을 등급화하는 체계는 아직 제시된 바가 없다. 따라서 우리는 대장암의 기 존재 샘종으로서의 무경성톱니모양병변을 기술할 때에는 이형성의 여부만 명시하면 될 것으로 권고한다.



모든 전통툽니모양샘종은 전암성 이형성 병변으로 취급되지만, 전통툽니모양샘종의 이형성을 분류하거나 등급화하는 체계는 아직 제시된 바가 없다. 따라서 우리는 대장암의 기 존재 샘종으로서의 전통툽니모양샘종을 진단할 때 따로 이형성에 대한 언급 없이 전통툽니모양샘종만을 기술하면 될 것으로 권고한다. 전통툽니모양샘종은 평편하다가 예리하게 파인 형태의 내강 툽니바퀴 모양 및 풍부한 호산성 세포질을 가진 키가 큰 원주세포, 가늘어진 핵, 이소성 움 형성 등을 특징으로 한다(Fig. 4D). 전통툽니모양샘종은 종종 다른 툽니모양병변이나 전형적 샘종을 동반한 혼합형 병변의 형태로 나타날 수 있다[38].

전형적 샘종 및 툽니모양병변을 모두 포함하여 두 가지 이상의 조직학적 아형의 조합으로 이루어진 전암성 병변일 경우에는 혼합형 샘종(mixed adenoma)이라는 용어를 사용할 수 있다.

---

#### Associated findings

- Absent
- Tumor perforation (pT4a)
- Perforation (non-tumor perforation)
- Metastasis to one site or organ without peritoneal metastasis (pM1a)
- Metastasis to two or more sites or organs without peritoneal metastasis (pM1b)
- Metastasis to the peritoneal surface with or without other site or organ metastasis (pM1c)

Specify metastatic sites or organs: \_\_\_\_\_

---

해설: 종양에 의한 천공은 대장암에서 나쁜 예후와 관련이 있는 것으로 알려져 있다[39]. 종양이 침범하지 않은 부위의 천공도 복막염이나 패혈증을 유발할 수 있어 나쁜 예후와 관련이 있는 것으로 알려져 있으며, 주로 내강을 막는 종양의 근위부에서 발생한다. 원격전이는 AJCC 8판에 따라, 복막 전이가 없으면서 한 위치 또는 한 장기로 전이하였을 경우 pM1a, 복막전이가 없으면서 둘 이상의 위치 또는 둘 이상의 장기로 전이하였을 경우 pM1b로 분류하고, 복막전이가 있을 경우에는 pM1c로 분류한다[4].

---

#### Separate lesions

- Absent
- Adenoma
- Polyps
- GIST
- Ulcerative colitis/Crohn's disease
- Others

Specify: \_\_\_\_\_

---

## 절제 대장의 선택 기재사항

### Tumor budding

- Not identified
- Present
  - ≤4 buds (low)
  - 5–9 buds (intermediate)
  - ≥10 buds (high)
- Cannot be assessed (specify: \_\_\_\_\_)

해설: 종양 발아는 대장 및 직장암에서 잘 알려진 독립적인 나쁜 예후인자이다[40]. 종양발아는 다음과 같은 이유로 대장 및 직장암환자의 진료에 도움이 될 수 있다: (1) 내시경적으로 절제된 점막 절제술 검체에서 점막하 침윤(pT1)을 보이는 대장 및 직장암의 경우, 종양발아는 림프절 전이의 위험을 높일 수 있는 나쁜 예후인자이다[26,41,42]. 따라서 종양 발아를 보이는 환자는 잠재적인 수술절제 후보자로 볼 수 있다. (2) 높은 등급의 종양 발아를 보이는 병기 II(pT3N0 and pT4N0) 대장 및 직장암 환자 군은 그렇지 않은 환자 군과 비교하여 더 나쁜 재발율을 보인다. 그러므로 높은 등급의 종양발아는 수술 후 보조요법이 필요한 환자 군의 선별에 유용할 수 있다[43]. (3) 수술 전 생검 검체에서 종양발아의 존재는 전보조치료(수술전 항암치료)에 대한 높은 위험성(저항성)을 보일 수 있는 직장암 환자군 선별에도 도움이 될 수 있다[44,45]. 그러므로, 점막절제술 pT1 대장직장암 환자 및 병기 II의 대장직장암 환자의 경우, 종양발아에 관한 항목을 병리 진단지에 기재하는 것을 권장한다.

2016년에 열린 International Tumor Budding Consensus Conference (ITBCC)에서 다음과 같은 종양 발아의 평가기준을 제시하였다[46]. (1) 종양발아는 1개 혹은 4개 이하의 암세포 군들로 정의한다. (2) 종양발아는 모든 슬라이드를 검토한 후 침윤성 성장을 보이는 종양의 침습면 중 종양발아가 가장 잘 관찰되는 부위에서 측정하는 것을 권장한다(0.785mm<sup>2</sup>의 필드이거나, 대안 렌즈 FN 지름이 20 mm인 ×200 배 시야). (3) 종양발아는 H&E 슬라이드에서 평가가 가능하다. Cytokeratin 면역염색은 H&E 슬라이드에서 종양주변에 염증의 침윤이 심해 반응성 간질 세포와 구분이 힘든 경우 도움이 될 수 있고, 더 나은 재현성과 관찰자간의 동의를 높일 수 있지만[47], 세포 자멸체 및 세포파편에도 염색되어 종양발아로 오인될 수 있다[46,48].

따라서 위에 기재한 종양 발아에 대한 3가지 등급체계를 추천한다. 하지만, 종양 발아의 등급체계는 절대적인 기준이 아니며, 종양발아의 개수를 측정-기재하는 것이 정보손실 등의 위험을 피할 수 있다. 드문 조직학적 유형을 보이는 경우(점액샘암종, 인산화세포암종, 미세유두샘암종, 그리고 수질암종) 종양 발아의 평가는 주의를 요한다[46]. 그러므로 종양 발아를 정확하게 평가할 수 없는 경우 'cannot be assessed' 라고 기재하며 그 이유를 제시한다.

### Tumor border configuration

해설: 종양의 경계부 배열에 대한 정보는 AJCC 8판과 College of American Pathologists (CAP) guidelines for colorectal cancers에 모두 제시되어 있지 않고, WHO 분류에 간략하게 언급되고 있다[3-5]. 비록 종양의 경계부 배열에 대한 평가는 쉽고 H&E 슬라이드로 평가할 수 있지만, 처음에 제시된 모호한 진단 기준 때문에 관찰자간의 재현성이 부족하다[49]. 이러한 이유로 이번 표준화 작업 진단지에서 제외하였다.

### Completeness of total mesorectal excision

- Complete
- Nearly complete
- Incomplete
- Cannot be determined

해설: 전직장간막절제술(total mesorectal excision)이란 직장암을 제거할 때 직장간막의 바깥쪽 면인 느슨한 섬유성 결합조직 내에서 림프절을 포함한 직장을 둘러싸는 연부조직을 한꺼번에 제거하는 것이다[50]. 전직장간막절제술을 시행하여 종양이 침투한 가장자리 부위까지 적절히 절제하면 충분한 절제연이 확보되어 국소재발률이 감소한다는 것이 다수의 비무작위연구를 통하여 밝혀진 바 있다. 육안검색 시 장막으로 덮여 있지 않은 측면에 대해 직장간막이 완벽히 절제되었는지 여부를 가장 나쁜 곳을 기준으로 평가하고 점수화하여 보고한다[3,4,7]. 등급 부여의 기준은 아래와 같다.

Complete: 직장간막이 온전히 절제되어 원추형모양이 없는 매끈한 원통형. 절제면의 불규칙함이 거의 없음(결손이 있더라도 결손의 깊이 0.5 cm 이하).

Nearly complete: 직장간막 절단면이 불규칙함. 결손이 고유근층까지 확장되지 않음(결손부분의 깊이 0.5 cm 초과). 직장 고유근층이 노출되어 있지 않음(원위부 끝 올림근 부착 부위 제외).

Incomplete: 직장간막에 심각한 결손 있음. 직장 고유근층이 노출됨.

---

### Preoperative chemoradiotherapy

Yes     No     Not known

#### If yes) Tumor regression grade

Grade 0: No viable cancer cells (complete response)

Grade 1: Single cells or rare small groups of cancer cells (near-complete response)

Grade 2: Residual cancer with evident tumor regression, but more than single cells or rare small groups of cancer cells (partial response)

Grade 3: Extensive residual cancer with no evident tumor regression (poor or no response)

---

해설: 직장암의 치료 원칙은 근치적 절제 수술로 잔존하는 종양이 없는 상태를 이루는 것으로 국소 진행된 직장암은 골반 내 재발의 감소를 위한 보조 치료로 수술 전 항암화학방사선치료(chemoradiotherapy) 후 전직장간막절제술이 치료의 원칙이다[51,52]. 수술 전 항암화학방사선치료의 종양반응등급(tumor regression grade)은 환자의 예후 및 재발 감소에 매우 중요한 요인이다[53-55]. 종양반응등급은 각 나라 및 기관마다 서로 다른 분류 및 등급체계를 사용하고 있으며, 이와 관련된 여러 연구 논문들 역시 제각각 상이한 등급 체계를 적용하고 있어 임상 및 병리의사들간에 혼란을 주고 있다[4,53-59]. AJCC/CAP 종양반응등급 분류체계는 현재 National Comprehensive Cancer Network (NCCN) 가이드라인에서도 사용되고 있는 가장 많이 사용되고 있는 분류체계로서 종양반응등급 판정 시 림프절내 존재하고 있는 종양은 종양반응등급 판정에서 고려하지 않고 있다[4]. 대한병리학회 소화기병리학 연구회에서는 2006년 “대장암 병리보고서 기재사항 표준화”에서 제안한 바에 따라 치료 효과를 등급화 된 숫자로 기술하지 않고, 퇴행 정도를 서술하는 것을 권장하였다[1]. 그러나, 서술적 판단기준 역시 병리의사 간 차이가 존재하고 있고, 이러한 서술적 분류체계가 널리 사용되고 있지 않아 기존의 숫자화 된 등급체계와 혼란을 주고 있다. 이를 극복하고자 소화기병리학 연구회에서는 널리 통용될 수 있는 새로운 종양반응등급을 8판 AJCC 및 CAP cancer protocol을 기반으로 분류하였다(Fig. 5)[3,4].

종양의 종양반응 등급판정을 위하여 육안적으로 종양이 구분되고 주변 연부조직까지 침윤한 경우 최소한 4개 이상의 대표적 절편을 포매 하여야 한다. 섬유화가 진행되어 있어 주변지방조직 침윤이 확실하지 않거나, 정상 점막 아래에 섬유화가 있는 검체 및 2.0 cm 이하의 병변은 상, 하 방향으로 0.4 cm 간격으로 절제 후 병변 전체를 포매하는 조직구축학적 검사를 권장한다. 수술 전 항암화학방사선치료 후 적출된 검체의 특징은 종양세포가 많은 양의 섬유화로 치환되며, 포말담식세포를 포함하여 많은 양의 염색세포가 침윤되어 있다. 또한 부종, 점액변성, 괴사 등을 볼 수 있고 종양세포가 없는 점액 용덩이(acellular mucin) 등을 관찰할 수 있다. 종양세포 없이 점액소 혹은 괴사조직만 관찰될 경우 병리학적으로는 완전 퇴행 반응(complete regression)으로 판정할 수 있다. 종양세포와 거대세포 및 섬유모세포와의 감별이 어려울 경우, 계단식 절편을 시행하거나, 점액염색 혹은 cytokeratin과 같은 면역조직화학염색 등을 시행함으로써 종양반응등급 분류 판정에 도움을 받을 수 있다.

### EGFR immunohistochemistry

해설: 그 동안의 연구들에 따르면 대장암의 25%–90%에서 epidermal growth factor receptor (EGFR) 단백질의 발현이 면역조직화학염색에서 관찰되었다[60-64]. 초기에 발표된 연구들에서는 대장암에서 면역조직화학염색을 통한 EGFR 발현 증거가 cetuximab 이나 panitumumab과 같은 EGFR 표적 치료제 적용을 위한 필수적인 요소라고 생각하였다[65]. 하지만, 후속 연구들에서 EGFR 면역조직화학염색 발현 정도와 이들 약물에 대한 치료반응 사이에 상관 관계가 없음이 밝혀졌다[66-68]. 따라서, 현재 면역조직화학염색에 의한 EGFR 발현은 EGFR 표적 치료제 반응의 예측인자로 간주되지 않으며, EGFR 표적 치료제에 대한 최근 연구들에서는 EGFR 발현을 치료 적용 기준에 포함시키지 않고 있다. 국내에서는 대장암 환자에서 EGFR 표적 치료제를 적용하기 위해서는 EGFR 발현이 확인되어야 한다는 건강보험심사평가원의 요양급여 적용기준에 따라 EGFR 면역조직화학염색이 아직까지 시행되고 있지만, 면역조직화학염색 상 EGFR의 발현이 EGFR 표적 치료제의 치료효과를 정확하게 예측하는지에 대해서는 근거가 없다.

---

### DNA mismatch repair immunohistochemistry

MLH1:  Positive (Retained expression)

Negative (Loss of expression)

MSH2:  Positive (Retained expression)

Negative (Loss of expression)

PMS2:  Positive (Retained expression)

Negative (Loss of expression)

MSH6:  Positive (Retained expression)

Negative (Loss of expression)

Summary: DNA mismatch repair deficiency (was/was not) observed

---

해설: 대장암 조직에서 DNA mismatch repair (MMR) 단백질에 대한 면역조직화학염색은 4가지 MMR 유전자들 (MLH1, MSH2, MSH6 및 PMS2) 중 하나에서의 배선 돌연변이(germline mutation) 또는 프로모터 과메틸화(promoter CpG island hypermethylation)에 의해 발생하는 MMR 결핍(MMR deficiency)을 판정하기 위한 매우 간단하고 유용한 방법이다[69-71]. MMR 결핍은 DNA 현미부수체(microsatellite) 반복 서열이 유전체 전반적으로 길이 변화를 보이는 것을 특징으로 하는 현미부수체 불안정성(high level of microsatellite instability, MSI-H)의 고유한 원인이다[72]. MLH1은 PMS2와 이합체(dimer)를 이루어 DNA MMR 기능을 수행하므로, 대장암에서 MLH1 유전자의 돌연변이 또는 프로모터 메틸화가 발생하게 되면 MLH1 및 PMS2의 면역조직화학적 발현은 모두 음성 소견을 보인다[69,70]. 마찬가지로, MSH2는 MSH6와 이합체를 이루기 때문에, MSH2에 돌연변이를 가지는 대장암은 MSH2 및 MSH6 면역조직화학 검사에서 모두 음성을 나타낸다[69,70]. 그러나 대장암에서 PMS2 또는 MSH6 유전자의 돌연변이가 발생하면, MLH1 및 MSH2의 발현은 유지되고 PMS2 또는 MSH6의 발현만이 소실된다[69,70].

MMR 양성을 면역조직화학염색을 이용하여 판정하기 위해서는 핵에 염색된 양상이 나타나야만 한다. MMR 단백질 중 적어도 하나가 종양세포의 핵에서 발현 소실이 되어 있다면 MMR 결핍으로 판정할 수가 있다(Fig. 6).

MMR 면역조직화학염색은 현재 대장암에서 린치증후군 또는 산발성 MSI-H 대장암의 선별검사를 위한 조직병리학적 도구 확립되어 있다[69-71]. MMR 결핍(또는 MSI-H)가 대장암에서 좋은 예후와 유의한 관련이 있는 한편, 5-fluorouracil (5-FU)를 기반으로 하는 보조적 항암화학요법에 대한 저항성과 관련성이 있음이 메타분석 결과를 포함한 이전의 많은 데이터들에 의하여 입증된 바 있다[72-74]. 또한 최근의 연구들에 따르면 MMR 결핍(또는 MSI-H)이 대장암을 포함한 여러 고형암에서 PD-1 차단을 사용한 항암면역치료의 중요한 치료반응 예측 인자임이 입증되고 있다[75,76]. 따라서 면역조직화학염색을 통한 MMR 평가 혹은 DNA 분석을 이용한 MSI 평가는 외과적으로 절제된 모든 대장암 표본에 대하여 병리 보고서를 통하여 그 결과를 공식적으로 보고하는 것이 요망된다.

## Immunoscore

해설: 종양침윤림프구(tumor-infiltrating lymphocyte, TIL)가 대장암 환자의 예후와 밀접한 관련이 있다는 사실이 다수의 연구들에 의하여 일관되게 입증되었다[77]. 구체적으로는 대장암에서 TIL의 수치가 높을수록 대장암 환자의 예후가 좋다는 것인데, 몇몇 연구에서는 TIL이 TNM 병기 및 현미부수체 불안정성(microsatellite instability, MSI)과 독립적으로 유의한 예후적 영향이 있다고 주장하였다[78,79]. 대장암에서 예후와 관련된 TIL의 구성은 세포독성 T 림프구가 주를 이루고 있으며 따라서 CD3 및 CD8 면역조직화학염색을 시행하는 것이 TIL 측정의 근간을 이루고 있다[78,80].

이들 연구결과에 근거하여 'Immunoscore'라는 표준화된 분류체계를 도입하려는 시도가 이루어지고 있으며 2012년에 Jerome Galon 박사가 주도하는 다국적 연구자들의 테스크포스 컨소시엄이 이루어져 immunoscore와 관련된 컨센서스를 이루기 위한 사업이 추진되고 있다(<http://www.immunoscore.org>)[80,81]. 대장암에서 immunoscore를 판정하기 위한 단계는 다음과 같다: (1) 대표 종양 절편을 선택, (2) 선택된 종양 절편에 대하여 CD3 및 CD8 면역염색을 시행, (3) 종양침윤경계부(invasive margin, IM) 및 종양중심부(tumor center, TC) 두 영역에 대하여 각각의 CD3 양성 세포 및 CD8 양성 세포의 밀도를 구함, (4) 이로써 산출되는 4가지 변수 (CD3+ IM, CD3+ TC, CD8+ IM, and CD8+ TC) 각각에 대하여 high 혹은 low로 분류하는 이분 범주화를 시행, (5) 4가지 변수의 결과를 종합하여 최종 immunoscore를 산출(예: 'high'가 하나도 없으면 I0, 'high'가 하나만 있으면 I1, 'high'가 둘 있으면 I2, 'high'가 셋 있으면 I3, 넷 모두 'high'이면 I4).

비록 immunoscore가 대장암에서 예후적 유의성을 지닌다는 강력한 증거들이 존재하지만, immunoscore의 적응증, 평가법 및 분류법의 측면에 있어서 전세계적으로 잘 합의된 컨센서스를 이루지는 못하고 있다. 현행 immunoscore의 가장 중요한 제한점 가운데 하나는 CD3 혹은 CD8 양성 세포의 밀도를 high 및 low로 범주화시키기 위한 기준값을 어떻게 설정할 것이냐는 문제가 있다. 디지털 이미지를 통한 자동화된 형태계측방법(automated analysis)이 향후 표준화된 평가기준을 마련하는데 도움이 될 수 있을 것이다. 결론적으로 대장암에서 immunoscore의 평가 및 보고는 임상적인 필요성 및 기관의 수행능력 등에 기반하여 권장될 수는 있으나 현재 병리보고서의 필수 기재사항에는 포함하지 않았다.

---

## Microsatellite instability (MSI)

Summary:  MSI-stable (MSS)

MSI-low (MSI-L)

MSI-high (MSI-H)

---

해설: 현미부수체불안정은 불일치복구 유전자(mismatch repair gene; MLH1, MSH2, MSH6, PMS2)의 태생적 돌연변이(germline mutation) 또는 MLH1 유전자 프로모터의 과메틸화에 의한 MMR 결핍(MMR deficiency)으로 염기서열 내 현미부수체의 길이가 변화하는 현상이다[72]. NCCN 가이드라인과 미국 대장암 바이오마커 가이드라인에서는 현미부수체불안정은 림치증후군의 선별을 위하여 모든 대장암에서 시행하는 것을 권장한다[82]. 또한, 대장암에서 현미부수체불안정은 좋은 예후와 연관되며, 5-FU 기반의 보조항암화학요법에 대한 저항성과 연관된다[83,84]. 최근의 연구에서 현미부수체불안정은 PD1 억제제를 이용한 종양면역치료의 치료반응 예측인자로 입증되었다[75,85].

현미부수체불안정을 측정하는 표준검사법(gold standard)은 모세관전기이동(capillary electrophoresis)를 이용하여 정상조직 대비 종양조직에서의 핵산종족산물의 길이변화를 비교하는 방법이다. 두 개의 모노뉴클레오타이드 마커(BAT25, BAT26), 세 개의 다이뉴클레오타이드 마커(D5S346, D2S123, D17S250)를 검사하는 베데스다 패널(Bethesda panel)과, 다섯 개의 모노뉴클레오타이드 마커(NR-27, NR-21, NR-24, BAT-25, BAT-26)를 검사하는 준단일체(quasimonomorphic) 모노뉴클레오타이드 마커패널을 사용할 수 있다[86,87]. 준단일체 모노뉴클레오타이드 마커패널의 경우 실시간 중합효소연쇄반응(real-time PCR) 기법으로도 검사가 가능하다. 현미부수체 고불안정형(microsatellite instability-high, MSI-high, MSI-H)을 보이는 경우 불일치복구 단백질에 대한 면역조직화학검사를 추가적으로 시행하여 림치증후군을 선별해야 한다. MLH1의 발현이 소실된 MSI-H 대장암에서 BRAF V600E 돌연변이가 양성인 경우 림치증후군을 배제할 수 있다[88]. 현미부수체불안정은 불일치복구결핍(mismatch repair deficiency, dMMR)과 상응하므로 모세관전기이동 검사법을 사용할 수 없는 경우 불일치복구 단백질

인 MLH1, MSH2, MSH6, PMS2에 대한 면역조직화학검사법으로 같음할 수 있다.

베테스다 패널은 다섯 개의 현미부수체 마커 중 2개 이상의 마커가 불안정을 보이는 경우 'MSI-H'이라고 보고하며, 현미부수체 마커 중 한 개의 마커가 불안정을 보이는 경우 '현미부수체 저불안정형(microsatellite instability-low, MSI-low, MSI-L)'이라고 보고한다. 현미부수체 마커 중 단 하나에서도 불안정이 관찰되지 않는 경우 '현미부수체안정형(microsatellite stable, MSS)'라고 보고한다[87]. Quasimonomorphic mononucleotide marker의 경우 MSI-H의 기준을 마커 3개 이상이 불안정을 보일 때로 해야 하는지, 마커 2개 이상이 불안정을 보일 때로 해야 하는지에 대하여 아직 이견이 있다[89,90].

---

#### **KRAS mutation analysis**

- No mutation detected
- Mutation detected (specify: *example: c.35G->A, p.Gly12Asp* \_\_\_\_\_)

#### **NRAS mutation analysis**

- No mutation detected
- Mutation detected (specify: *example: c.35G->A, p.Gly12Asp* \_\_\_\_\_)

---

해설: *KRAS* 유전자와 *NRAS* 유전자 각각의 exon 2, 3, 4에 대하여 돌연변이의 유무를 검사하는 것을 확장형 *RAS* 돌연변이 검사라고 한다[82,91]. 전이성 대장암에서 표피성장인자수용체 차단제(EGFR blocker)의 단일요법/병용요법은 환자의 생존 기간을 유의하게 증가시킨다고 알려져 있으나, *KRAS* 유전자의 exon 2, 3, 4와 *NRAS* 유전자의 exon 2, 3, 4에 점돌연변이가 존재할 경우 표피성장인자수용체 차단제에 저항성을 띠는 것으로 알려져 있다. 따라서 전이성 대장암 환자에서 표피성장인자수용체 차단제를 사용하려는 경우 반드시 *KRAS* exon 2, 3, 4와 *NRAS* exon 2,3,4를 모두 포함하는 확장형 *RAS* 돌연변이검사(extended *RAS* mutation test)를 시행할 것을 유럽종양학회(European Society for Medical Oncology, ESMO) 가이드라인, NCCN 가이드라인, 미국 대장암 바이오마커 가이드라인 등에서 권장하고 있다[82,91-93]. 한편, *KRAS* 유전자의 exon 2의 점돌연변이는 대장암의 불량한 예후와 연관된 것으로 알려져 있다[94-98].

확장형 *RAS* 돌연변이검사는 생어시퀀싱(Sanger sequencing), 파이로시퀀싱(pyrosequencing), 실시간 중합효소연쇄반응(real-time PCR) 등이 사용될 수 있으며, 차세대시퀀싱 고품질 패널을 이용하여 검사가 가능하게 되었다. *KRAS*, *NRAS* 유전자의 exon 2, 3, 4에 대하여 점돌연변이의 유무와 검출된 점돌연변이의 종류를 보고하여야 하며, 유전자 명명법은 공인된 명명법을 사용해야 한다.

---

#### **BRAF mutation analysis**

- No mutation detected
- BRAF* V600E (c.1799T>A) mutation
- Other *BRAF* mutation (specify: \_\_\_\_\_)

---

해설: *BRAF* V600E 돌연변이는 MLH1 프로모터의 과메틸화를 보이는 현미부수체불안정 대장암 환자의 3분의 2 가량에서 발견되는 것으로 보고되고 있으나, 림치증후군 환자에서는 *BRAF* V600E 돌연변이가 관찰되지 않는다[99]. 따라서 현미부수체불안정 대장암 환자에서 *BRAF* V600E 돌연변이 검사가 양성인 경우 림치증후군을 배제할 수 있으므로 불일치복구 유전자에 대한 유전자 검사를 시행하지 않아야 한다[88].

현미부수체불안정과 *BRAF* V600E 돌연변이를 동시에 가진 환자군(MSI/*BRAF*-MT)은 매우 양호한 예후를 보이는 것으로 보고되었고, 현미부수체불안정 음성 대장암에서 *BRAF* V600E 돌연변이를 보이는 환자군(MSS/*BRAF*-MT)만 불량한 예후를

보이는 것으로 보고되었다[95-98]. 따라서 대장암 환자의 예후 예측을 위해서 *BRAF* 돌연변이 검사는 현미부수체불안정검사와 함께 사용되어야 한다. 전이성 대장암에서 행해진 두 연구에서 *BRAF* V600E 돌연변이는 불량한 예후와 연관되었다 [98,100].

표피성장인자수용체 차단제 치료에 있어 *BRAF* V600E 돌연변이가 불량한 치료 반응과 연관된다는 보고가 있으나, *BRAF* V600E 돌연변이가 독립적인 예측인자인지에 대해서는 논란이 계속되고 있다[101,102]. 2017년 NCCN guideline에서는 표피성장인자수용체 차단제의 적응증이 되는 전이성 대장암 환자에서 *BRAF* V600E 돌연변이 검사를 권고하고 있으나, ASCP guideline과 ESMO guideline에서는 권고하지 않고 있는 실정이다[82,91].

생어시퀀싱(Sanger sequencing), 파이로시퀀싱(pyrosequencing), 실시간 중합효소연쇄반응(real-time PCR) 등이 사용될 수 있으며, 차세대시퀀싱 고품질 패널을 이용하여 검사가 가능하게 되었다. *BRAF* exon 15 V600E 돌연변이의 존재 유무를 보고하여야 하며, 유전자 명명법은 공인된 명명법을 사용해야 한다.

대한병리학회 소화기병리학회연구회 대장암 기재사항 표준화 소위원회

위원: 김백희, 김준미, 강경훈, 장희진, 강동욱, 김정호, 배정모, 서안나, 박호성, 강윤경, 이경화, 조미연, 도인구, 이혜승, 장희경, 박도윤, 강효정, 손진희, 장미수, 정은선, 진소영, 유은실, 한혜승, 김윤화.

책임저자: 김준미 (인하대학교 병원)

## REFERENCES

1. Chang HJ, Park CK, Kim WH, et al. A standardized pathology report for colorectal cancer. *Korean J Pathol* 2006; 40: 193-203.
2. Ministry of Health and Welfare. Annual report of cancer statistics in Korea in 2015. Sejong: Ministry of Health and Welfare, 2017.
3. Kakar S, Shi C, Berho ME, et al. Protocol for the examination of specimens from patients with primary carcinoma of the colon and rectum, version 4.0.0.0. Illinois: College of American Pathologists, 2017.
4. Amin MB, Edge S, Greene F, et al. AJCC cancer staging system. 8th ed. New York: Springer, 2017.
5. WHO Classification of Tumours Editorial Board. WHO classification of tumours: digestive system tumours. 5th ed. Geneva: World Health Organization, 2019.
6. Fritz AG, Percy C, Jack A, et al. International classification of diseases for oncology (ICD-O). 3rd ed. 1st rev. Lyon: International Agency for Research on Cancer, 2013.
7. Langman G, Loughrey M, Shepherd N, Quirke P. Association of Coloproctology of Great Britain & Ireland (ACPGBI): guidelines for the management of cancer of the colon, rectum and anus (2017) - pathology standards and datasets. *Colorectal Dis* 2017; 19 Suppl 1: 74-81.
8. Nagtegaal I, Gaspar C, Marijnen C, Van De Velde C, Fodde R, Van Krieken H. Morphological changes in tumour type after radiotherapy are accompanied by changes in gene expression profile but not in clinical behaviour. *J Pathol* 2004; 204: 183-92.
9. Verdu M, Roman R, Calvo M, et al. Clinicopathological and molecular characterization of colorectal micropapillary carcinoma. *Mod Pathol* 2011; 24: 729-38.
10. Lee HJ, Eom DW, Kang GH, et al. Colorectal micropapillary carcinomas are associated with poor prognosis and enriched in markers of stem cells. *Mod Pathol* 2013; 26: 1123-31.
11. Nassar H. Carcinomas with micropapillary morphology: clinical significance and current concepts. *Adv Anat Pathol* 2004; 11: 297-303.
12. Xu F, Xu J, Lou Z, et al. Micropapillary component in colorectal carcinoma is associated with lymph node metastasis in T1 and T2 Stages and decreased survival time in TNM stages I and II. *Am J Surg Pathol* 2009; 33: 1287-92.
13. Haupt B, Ro JY, Schwartz MR, Shen SS. Colorectal adenocarcinoma with micropapillary pattern and its association with lymph node metastasis. *Mod Pathol* 2007; 20: 729-33.
14. Jakubowska K, Guzinska-Ustymowicz K, Pryczynicz A. Invasive micropapillary component and its clinico-histopathological significance in patients with colorectal cancer. *Oncol Lett* 2016; 12: 1154-8.
15. Tuppurainen K, Makinen JM, Junntila O, et al. Morphology and microsatellite instability in sporadic serrated and non-serrated colorectal cancer. *J Pathol* 2005; 207: 285-94.
16. Patai AV, Molnár B, Tulassay Z, Sipos F. Serrated pathway: alternative route to colorectal cancer. *World J Gastroenterol* 2013; 19: 607-15.

17. Mäkinen MJ. Colorectal serrated adenocarcinoma. *Histopathology* 2007; 50: 131-50.
18. Barresi V, Reggiani Bonetti L, Ieni A, Domati F, Tuccari G. Prognostic significance of grading based on the counting of poorly differentiated clusters in colorectal mucinous adenocarcinoma. *Hum Pathol* 2015; 46: 1722-9.
19. Bosman FT, Carneiro F, Hruban RH, Theise ND. WHO classification of tumours of the digestive system. 4th ed. Lyon: International Agency for Research on Cancer, 2010.
20. Kojima M, Shimazaki H, Iwaya K, et al. Intramucosal colorectal carcinoma with invasion of the lamina propria: a study by the Japanese Society for Cancer of the Colon and Rectum. *Hum Pathol* 2017; 66: 230-7.
21. Panarelli NC, Schreiner AM, Brandt SM, Shepherd NA, Yantiss RK. Histologic features and cytologic techniques that aid pathologic stage assessment of colonic adenocarcinoma. *Am J Surg Pathol* 2013; 37: 1252-8.
22. Uehara K, Nakanishi Y, Shimoda T, Taniguchi H, Akasu T, Moriya Y. Clinicopathological significance of microscopic abscess formation at the invasive margin of advanced low rectal cancer. *Br J Surg* 2007; 94: 239-43.
23. Smith KD, Tan D, Das P, et al. Clinical significance of acellular mucin in rectal adenocarcinoma patients with a pathologic complete response to preoperative chemoradiation. *Ann Surg* 2010; 251: 261-4.
24. Kang CM, Lim SB, Hong SM, et al. Prevalence and clinical significance of cellular and acellular mucin in patients with locally advanced mucinous rectal cancer who underwent preoperative chemoradiotherapy followed by radical surgery. *Colorectal Dis* 2016; 18: O10-6.
25. Kitajima K, Fujimori T, Fujii S, et al. Correlations between lymph node metastasis and depth of submucosal invasion in submucosal invasive colorectal carcinoma: a Japanese collaborative study. *J Gastroenterol* 2004; 39: 534-43.
26. Bosch SL, Teerenstra S, de Wilt JH, Cunningham C, Nagtegaal ID. Predicting lymph node metastasis in pT1 colorectal cancer: a systematic review of risk factors providing rationale for therapy decisions. *Endoscopy* 2013; 45: 827-34.
27. Haggitt RC, Glotzbach RE, Soffer EE, Wruble LD. Prognostic factors in colorectal carcinomas arising in adenomas: implications for lesions removed by endoscopic polypectomy. *Gastroenterology* 1985; 89: 328-36.
28. Kikuchi R, Takano M, Takagi K, et al. Management of early invasive colorectal cancer: risk of recurrence and clinical guidelines. *Dis Colon Rectum* 1995; 38: 1286-95.
29. Watanabe T, Muro K, Ajioka Y, et al. Japanese Society for Cancer of the Colon and Rectum (JSCCR) guidelines 2016 for the treatment of colorectal cancer. *Int J Clin Oncol* 2018; 23: 1-34.
30. Betge J, Pollheimer MJ, Lindtner RA, et al. Intramural and extramural vascular invasion in colorectal cancer: prognostic significance and quality of pathology reporting. *Cancer* 2012; 118: 628-38.
31. Kim WH, Park CK, Kim YB, et al. A standardized pathology report for gastric cancer. *Korean J Pathol* 2005; 39: 106-13.
32. Liebig C, Ayala G, Wilks J, et al. Perineural invasion is an independent predictor of outcome in colorectal cancer. *J Clin Oncol* 2009; 27: 5131-7.
33. Liebig C, Ayala G, Wilks JA, Berger DH, Albo D. Perineural invasion in cancer: a review of the literature. *Cancer* 2009; 115: 3379-91.
34. Gibson JA, Odze RD. Pathology of premalignant colorectal neoplasia. *Dig Endosc* 2016; 28: 312-23.
35. Rex DK, Ahnen DJ, Baron JA, et al. Serrated lesions of the colorectum: review and recommendations from an expert panel. *Am J Gastroenterol* 2012; 107: 1315-29.
36. Bateman AC, Shepherd NA. UK guidance for the pathological reporting of serrated lesions of the colorectum. *J Clin Pathol* 2015; 68: 585-91.
37. Liu C, Walker NI, Leggett BA, Whitehall VL, Bettington ML, Rosty C. Sessile serrated adenomas with dysplasia: morphological patterns and correlations with MLH1 immunohistochemistry. *Mod Pathol* 2017; 30: 1728-38.
38. Chetty R, Hafezi-Bakhtiari S, Serra S, Colling R, Wang LM. Traditional serrated adenomas (TSAs) admixed with other serrated (so-called precursor) polyps and conventional adenomas: a frequent occurrence. *J Clin Pathol* 2015; 68: 270-3.
39. Anwar MA, D'Souza F, Coulter R, Memon B, Khan IM, Memon MA. Outcome of acutely perforated colorectal cancers: experience of a single district general hospital. *Surg Oncol* 2006; 15: 91-6.
40. Mitrovic B, Schaeffer DF, Riddell RH, Kirsch R. Tumor budding in colorectal carcinoma: time to take notice. *Mod Pathol* 2012; 25: 1315-25.
41. Choi DH, Sohn DK, Chang HJ, Lim SB, Choi HS, Jeong SY. Indications for subsequent surgery after endoscopic resection of submucosally invasive colorectal carcinomas: a prospective cohort study. *Dis Colon Rectum* 2009; 52: 438-45.
42. Ueno H, Mochizuki H, Hashiguchi Y, et al. Risk factors for an adverse outcome in early invasive colorectal carcinoma. *Gastroenterology* 2004; 127: 385-94.
43. Wang LM, Kevans D, Mulcahy H, et al. Tumor budding is a strong and reproducible prognostic marker in T3N0 colorectal cancer. *Am J Surg*



- Pathol 2009; 33: 134-41.
44. Giger OT, Comtesse SC, Lugli A, Zlobec I, Kurrer MO. Intra-tumoral budding in preoperative biopsy specimens predicts lymph node and distant metastasis in patients with colorectal cancer. *Mod Pathol* 2012; 25: 1048-53.
  45. Rogers AC, Gibbons D, Hanly AM, et al. Prognostic significance of tumor budding in rectal cancer biopsies before neoadjuvant therapy. *Mod Pathol* 2014; 27: 156-62.
  46. Lugli A, Kirsch R, Ajioka Y, et al. Recommendations for reporting tumor budding in colorectal cancer based on the International Tumor Budding Consensus Conference (ITBCC) 2016. *Mod Pathol* 2017; 30: 1299-311.
  47. Koelzer VH, Zlobec I, Berger MD, et al. Tumor budding in colorectal cancer revisited: results of a multicenter interobserver study. *Virchows Arch* 2015; 466: 485-93.
  48. Koelzer VH, Assarzadegan N, Dawson H, et al. Cytokeratin-based assessment of tumour budding in colorectal cancer: analysis in stage II patients and prospective diagnostic experience. *J Pathol Clin Res* 2017; 3: 171-8.
  49. Jass JR, Love SB, Northover JM. A new prognostic classification of rectal cancer. *Lancet* 1987; 1: 1303-6.
  50. Bosch SL, Nagtegaal ID. The importance of the pathologist's role in assessment of the quality of the mesorectum. *Curr Colorectal Cancer Rep* 2012; 8: 90-8.
  51. Aklilu M, Eng C. The current landscape of locally advanced rectal cancer. *Nat Rev Clin Oncol* 2011; 8: 649-59.
  52. Bibeau F, Rullier A, Jourdan MF, et al. Locally advanced rectal cancer management: which role for the pathologist in 2011? *Ann Pathol* 2011; 31: 433-41.
  53. Dhadda AS, Dickinson P, Zaitoun AM, Gandhi N, Bessell EM. Prognostic importance of Mandard tumour regression grade following pre-operative chemo/radiotherapy for locally advanced rectal cancer. *Eur J Cancer* 2011; 47: 1138-45.
  54. Mihaylova I, Parvanova V, Velikova C, Kurteva G, Ivanova D. Degree of tumor regression after preoperative chemo-radiotherapy in locally advanced rectal cancer-Preliminary results. *Rep Pract Oncol Radiother* 2011; 16: 237-42.
  55. Vallböhmer D, Bollschweiler E, Brabender J, et al. Evaluation of histological regression grading systems in the neoadjuvant therapy of rectal cancer: do they have prognostic impact? *Int J Colorectal Dis* 2012; 27: 1295-301.
  56. Kim SH, Chang HJ, Kim DY, et al. What is the ideal tumor regression grading system in rectal cancer patients after preoperative chemoradiotherapy? *Cancer Res Treat* 2016; 48: 998-1009.
  57. Mandard AM, Dalibard F, Mandard JC, et al. Pathologic assessment of tumor regression after preoperative chemoradiotherapy of esophageal carcinoma: clinicopathologic correlations. *Cancer* 1994; 73: 2680-6.
  58. Dworak O, Keilholz L, Hoffmann A. Pathological features of rectal cancer after preoperative radiochemotherapy. *Int J Colorectal Dis* 1997; 12: 19-23.
  59. Ryan R, Gibbons D, Hyland JM, et al. Pathological response following long-course neoadjuvant chemoradiotherapy for locally advanced rectal cancer. *Histopathology* 2005; 47: 141-6.
  60. Krasinskas AM. EGFR Signaling in Colorectal Carcinoma. *Patholog Res Int* 2011; 2011: 932932.
  61. Goldstein NS, Armin M. Epidermal growth factor receptor immunohistochemical reactivity in patients with American Joint Committee on Cancer Stage IV colon adenocarcinoma: implications for a standardized scoring system. *Cancer* 2001; 92: 1331-46.
  62. McKay JA, Murray LJ, Curran S, et al. Evaluation of the epidermal growth factor receptor (EGFR) in colorectal tumours and lymph node metastases. *Eur J Cancer* 2002; 38: 2258-64.
  63. Spano JP, Fagard R, Soria JC, Rixe O, Khayat D, Milano G. Epidermal growth factor receptor signaling in colorectal cancer: preclinical data and therapeutic perspectives. *Ann Oncol* 2005; 16: 189-94.
  64. Resnick MB, Routhier J, Konkin T, Sabo E, Pricolo VE. Epidermal growth factor receptor, c-MET, beta-catenin, and p53 expression as prognostic indicators in stage II colon cancer: a tissue microarray study. *Clin Cancer Res* 2004; 10: 3069-75.
  65. de Castro-Carpeno J, Belda-Iniesta C, Casado Saenz E, Hernandez Agudo E, Feliu Batlle J, Gonzalez Baron M. EGFR and colon cancer: a clinical view. *Clin Transl Oncol* 2008; 10: 6-13.
  66. Saltz LB, Meropol NJ, Loehrer PJ Sr, Needle MN, Kopit J, Mayer RJ. Phase II trial of cetuximab in patients with refractory colorectal cancer that expresses the epidermal growth factor receptor. *J Clin Oncol* 2004; 22: 1201-8.
  67. Vallböhmer D, Zhang W, Gordon M, et al. Molecular determinants of cetuximab efficacy. *J Clin Oncol* 2005; 23: 3536-44.
  68. Ogino S, Meyerhardt JA, Cantor M, et al. Molecular alterations in tumors and response to combination chemotherapy with gefitinib for ad-

- vanced colorectal cancer. *Clin Cancer Res* 2005; 11: 6650-6.
69. Geiersbach KB, Samowitz WS. Microsatellite instability and colorectal cancer. *Arch Pathol Lab Med* 2011; 135: 1269-77.
  70. Pino MS, Chung DC. Microsatellite instability in the management of colorectal cancer. *Expert Rev Gastroenterol Hepatol* 2011; 5: 385-99.
  71. Samowitz WS. Evaluation of colorectal cancers for Lynch syndrome: practical molecular diagnostics for surgical pathologists. *Mod Pathol* 2015; 28 Suppl 1: S109-13.
  72. Boland CR, Goel A. Microsatellite instability in colorectal cancer. *Gastroenterology* 2010; 138: 2073-87.
  73. Guastadisegni C, Colafranceschi M, Ottini L, Dogliotti E. Microsatellite instability as a marker of prognosis and response to therapy: a meta-analysis of colorectal cancer survival data. *Eur J Cancer* 2010; 46: 2788-98.
  74. Pritchard CC, Grady WM. Colorectal cancer molecular biology moves into clinical practice. *Gut* 2011; 60: 116-29.
  75. Le DT, Uram JN, Wang H, et al. PD-1 blockade in tumors with mismatch-repair deficiency. *N Engl J Med* 2015; 372: 2509-20.
  76. Le DT, Durham JN, Smith KN, et al. Mismatch repair deficiency predicts response of solid tumors to PD-1 blockade. *Science* 2017; 357: 409-13.
  77. Roxburgh CS, McMillan DC. The role of the in situ local inflammatory response in predicting recurrence and survival in patients with primary operable colorectal cancer. *Cancer Treat Rev* 2012; 38: 451-66.
  78. Kirilovsky A, Marliot F, El Sissy C, Haicheur N, Galon J, Pages F. Rational bases for the use of the Immunoscore in routine clinical settings as a prognostic and predictive biomarker in cancer patients. *Int Immunol* 2016; 28: 373-82.
  79. Mlecnik B, Bindea G, Angell HK, et al. Integrative analyses of colorectal cancer show immunoscore is a stronger predictor of patient survival than microsatellite instability. *Immunity* 2016; 44: 698-711.
  80. Galon J, Mlecnik B, Bindea G, et al. Towards the introduction of the 'Immunoscore' in the classification of malignant tumours. *J Pathol* 2014; 232: 199-209.
  81. Galon J, Pagès F, Marincola FM, et al. Cancer classification using the Immunoscore: a worldwide task force. *J Transl Med* 2012; 10: 205.
  82. Sepulveda AR, Hamilton SR, Allegra CJ, et al. Molecular biomarkers for the evaluation of colorectal cancer: guideline from the American Society for Clinical Pathology, College of American Pathologists, Association for Molecular Pathology, and the American Society of Clinical Oncology. *J Clin Oncol* 2017; 35: 1453-86.
  83. Zaanen A, Shi Q, Taieb J, et al. Role of deficient DNA mismatch repair status in patients with stage III colon cancer treated with FOLFOX adjuvant chemotherapy: a pooled analysis from 2 randomized clinical trials. *JAMA Oncol* 2018; 4: 379-83.
  84. Sargent DJ, Marsoni S, Monges G, et al. Defective mismatch repair as a predictive marker for lack of efficacy of fluorouracil-based adjuvant therapy in colon cancer. *J Clin Oncol* 2010; 28: 3219-26.
  85. Overman MJ, McDermott R, Leach JL, et al. Nivolumab in patients with metastatic DNA mismatch repair-deficient or microsatellite instability-high colorectal cancer (CheckMate 142): an open-label, multicentre, phase 2 study. *Lancet Oncol* 2017; 18: 1182-91.
  86. Umar A, Boland CR, Terdiman JP, et al. Revised Bethesda Guidelines for hereditary nonpolyposis colorectal cancer (Lynch syndrome) and microsatellite instability. *J Natl Cancer Inst* 2004; 96: 261-8.
  87. Boland CR, Thibodeau SN, Hamilton SR, et al. A National Cancer Institute Workshop on Microsatellite Instability for cancer detection and familial predisposition: development of international criteria for the determination of microsatellite instability in colorectal cancer. *Cancer Res* 1998; 58: 5248-57.
  88. Adar T, Rodgers LH, Shannon KM, et al. A tailored approach to BRAF and MLH1 methylation testing in a universal screening program for Lynch syndrome. *Mod Pathol* 2017; 30: 440-7.
  89. Buhard O, Cattaneo F, Wong YE, et al. Multipopulation analysis of polymorphisms in five mononucleotide repeats used to determine the microsatellite instability status of human tumors. *J Clin Oncol* 2006; 24: 241-51.
  90. Goel A, Nagasaka T, Hamelin R, Boland CR. An optimized pentaplex PCR for detecting DNA mismatch repair-deficient colorectal cancers. *PLoS One* 2010; 5: e9393.
  91. Van Cutsem E, Cervantes A, Adam R, et al. ESMO consensus guidelines for the management of patients with metastatic colorectal cancer. *Ann Oncol* 2016; 27: 1386-422.
  92. Amado RG, Wolf M, Peeters M, et al. Wild-type KRAS is required for panitumumab efficacy in patients with metastatic colorectal cancer. *J Clin Oncol* 2008; 26: 1626-34.
  93. Douillard JY, Oliner KS, Siena S, et al. Panitumumab-FOLFOX4 treatment and RAS mutations in colorectal cancer. *N Engl J Med* 2013; 369: 1023-34.

94. Rui Y, Wang C, Zhou Z, Zhong X, Yu Y. K-Ras mutation and prognosis of colorectal cancer: a meta-analysis. *Hepatogastroenterology* 2015; 62: 19-24.
95. Phipps AI, Limburg PJ, Baron JA, et al. Association between molecular subtypes of colorectal cancer and patient survival. *Gastroenterology* 2015; 148: 77-87.
96. Sinicrope FA, Shi Q, Smyrk TC, et al. Molecular markers identify subtypes of stage III colon cancer associated with patient outcomes. *Gastroenterology* 2015; 148: 88-99.
97. Taieb J, Le Malicot K, Shi Q, et al. Prognostic value of *BRAF* and *KRAS* mutations in MSI and MSS stage III colon cancer. *J Natl Cancer Inst* 2017; 109: djw272.
98. Schirripa M, Bergamo F, Cremolini C, et al. *BRAF* and *RAS* mutations as prognostic factors in metastatic colorectal cancer patients undergoing liver resection. *Br J Cancer* 2015; 112: 1921-8.
99. Wang L, Cunningham JM, Winters JL, et al. *BRAF* mutations in colon cancer are not likely attributable to defective DNA mismatch repair. *Cancer Res* 2003; 63: 5209-12.
100. Loes IM, Immervoll H, Sorbye H, et al. Impact of *KRAS*, *BRAF*, *PIK3CA*, *TP53* status and intraindividual mutation heterogeneity on outcome after liver resection for colorectal cancer metastases. *Int J Cancer* 2016; 139: 647-56.
101. Di Nicolantonio F, Martini M, Molinari F, et al. Wild-type *BRAF* is required for response to panitumumab or cetuximab in metastatic colorectal cancer. *J Clin Oncol* 2008; 26: 5705-12.
102. Pietrantonio F, Petrelli F, Coinu A, et al. Predictive role of *BRAF* mutations in patients with advanced colorectal cancer receiving cetuximab and panitumumab: a meta-analysis. *Eur J Cancer* 2015; 51: 587-94.

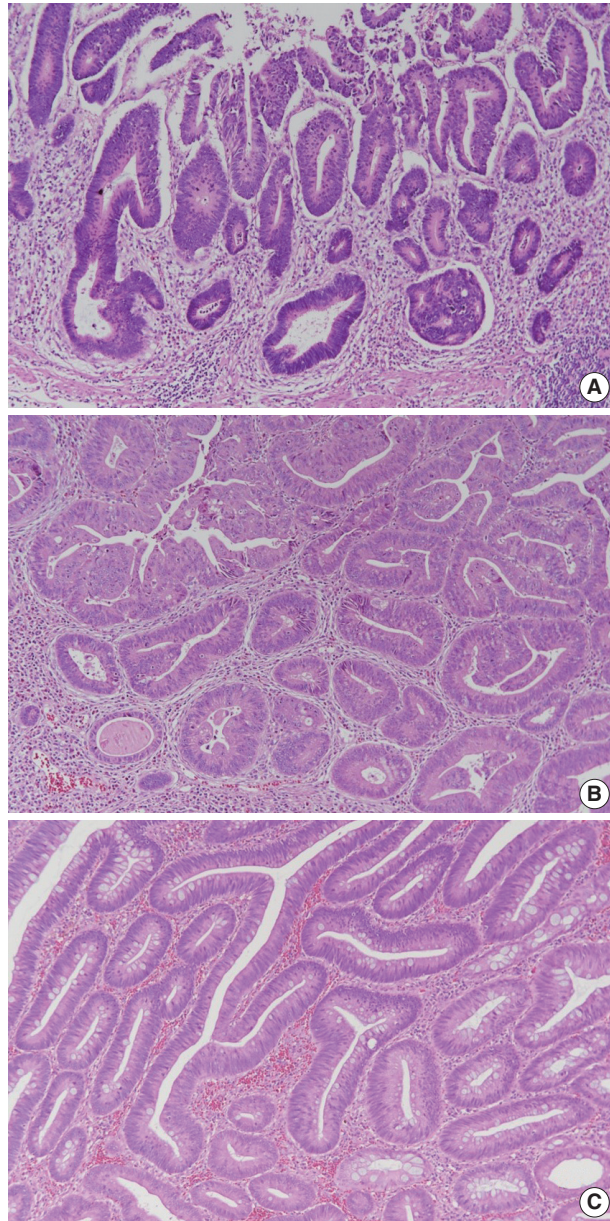

**Fig. 1.** Histologic features of intramucosal carcinoma. (A) The intramucosal carcinoma shows irregular invasive glands accompanied by desmoplasia. (B) The glands show excessive budding and luminal serration, which is highly suspicious for disruption of the basement membrane. (C) The elongated nuclei are seen in low-grade dysplasia, regardless of the ratio to the cell length.

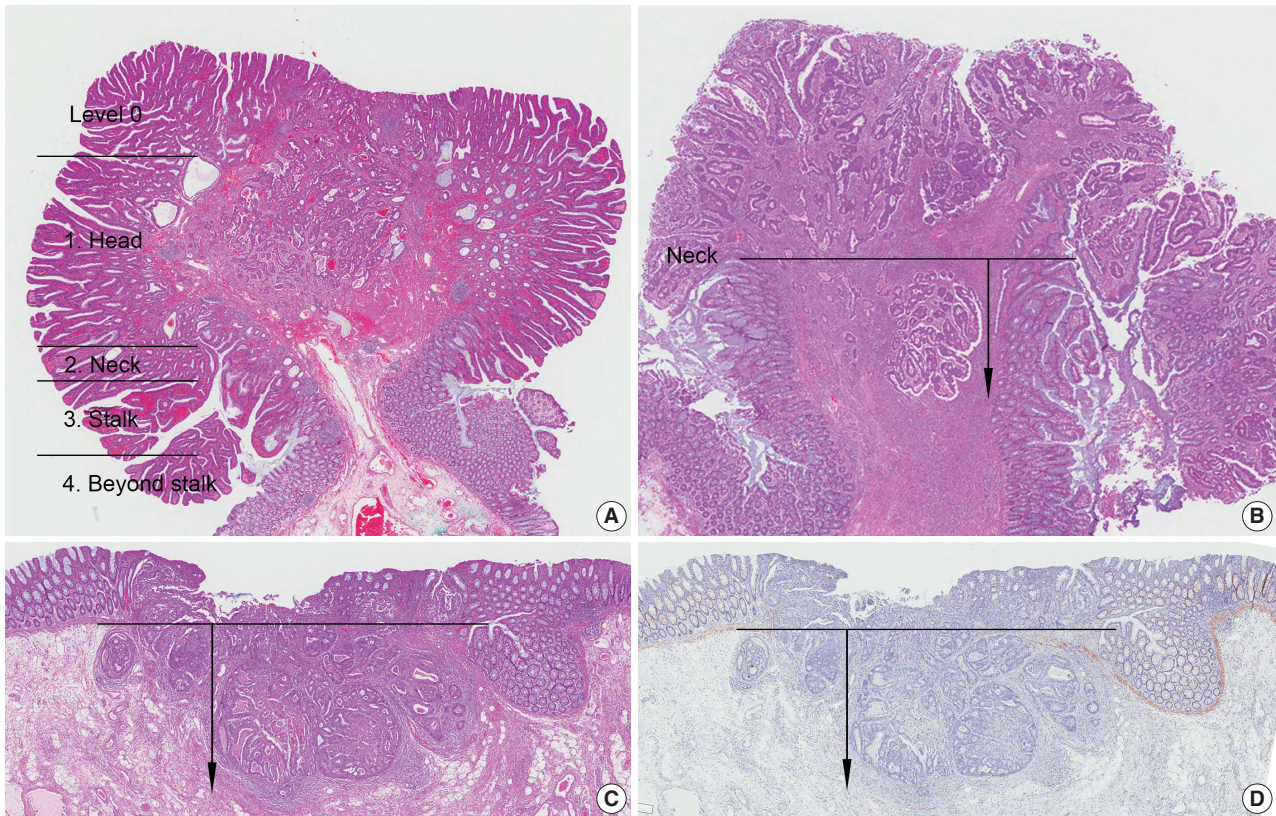

**Fig. 2.** Measuring depth of invasion in tumors with submucosal invasion. (A) Haggitt level of invasion is composed of head, neck, stalk, and beyond stalk in pedunculated tumors. (B) The depth of invasion should be measured from the neck of the polyp (Haggitt level 2). (C) In cases with disrupted muscularis mucosae, the depth of submucosa invasion is measured from a continuous line of the residual muscularis mucosae. (D) To highlight indistinct muscularis mucosae, immunohistochemistry for desmin may be performed.

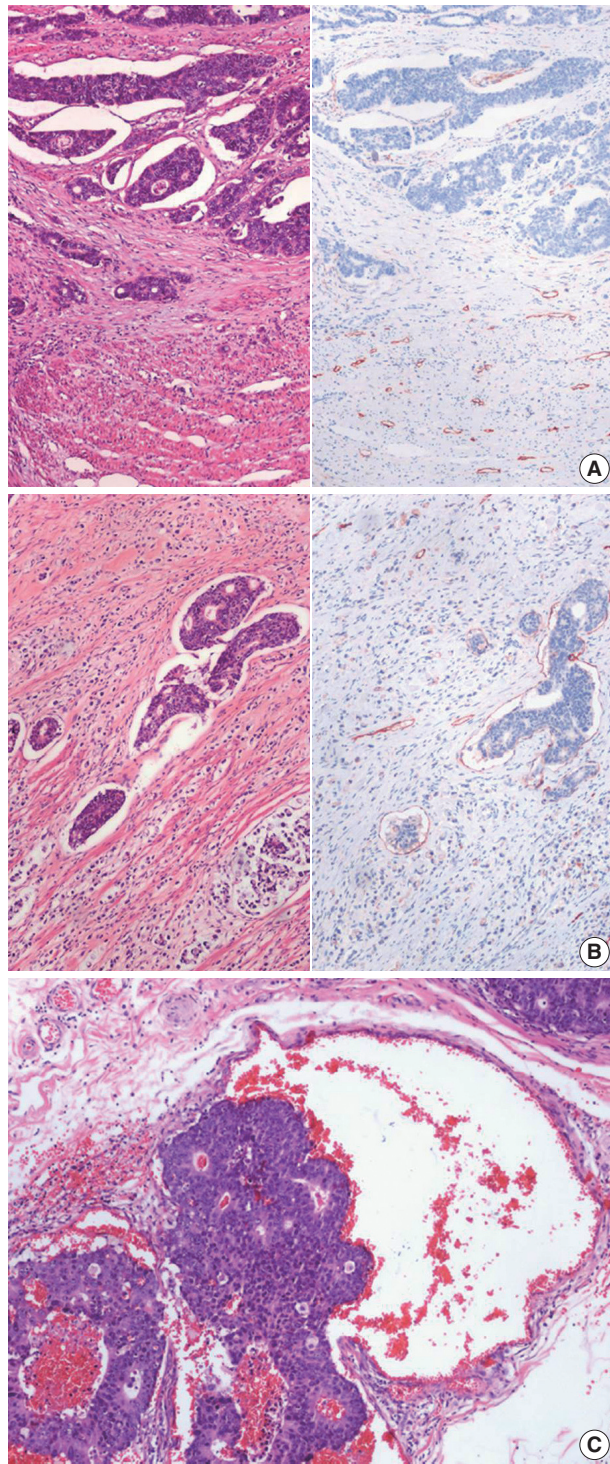

**Fig. 3.** Histologic features of lymphatic invasion and venous invasion. (A) Tumor clusters with retraction artifacts can be misinterpreted as lymphatic invasion (H&E stain and D2-40 immunohistochemical stain). (B) Tumor invasion of small vessels is considered as lymphatic invasion (H&E stain and D2-40 immunohistochemical stain). (C) Tumors involving vessels with identifiable smooth muscle layer or elastic lamina are considered as venous invasion.

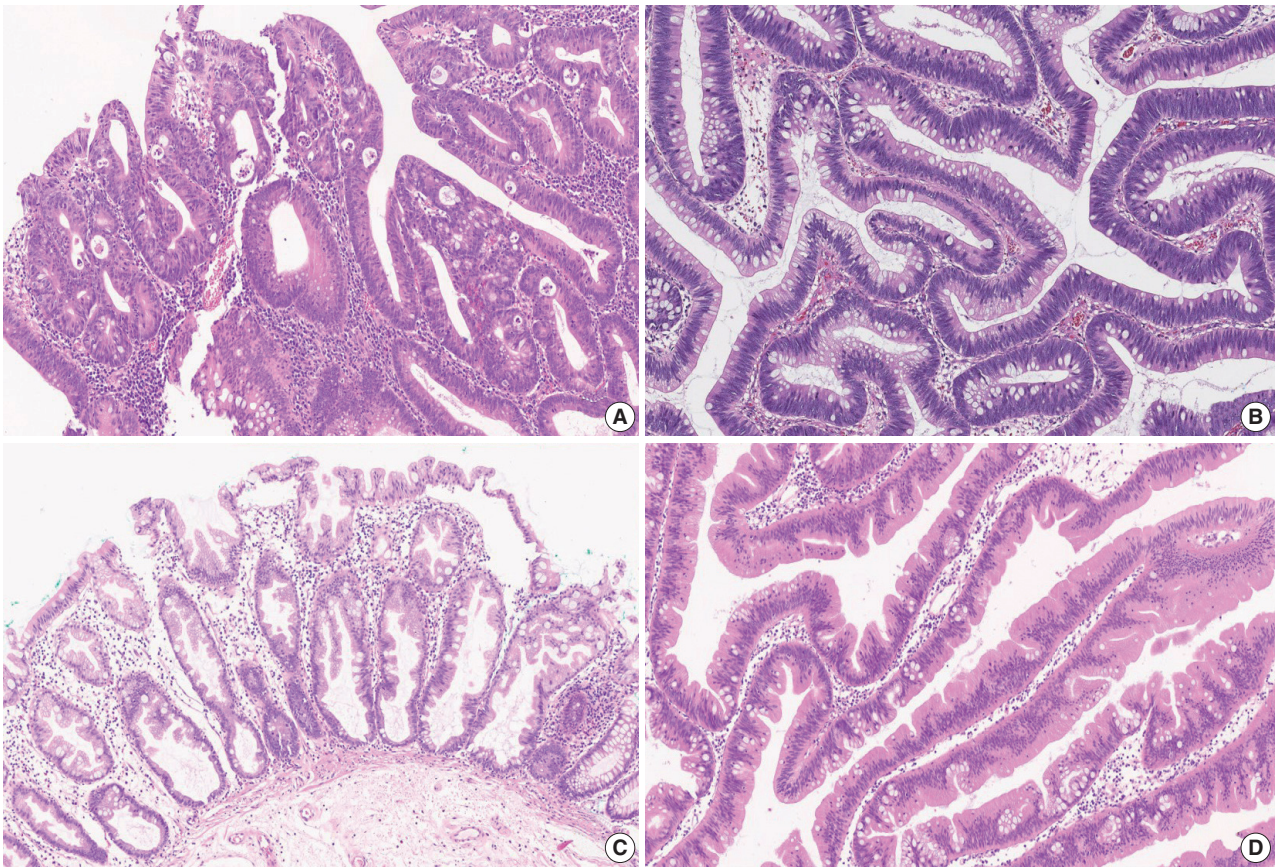

**Fig. 4.** Histologic features of premalignant lesions of the colorectum. (A) Tubular adenoma with high-grade dysplasia. Note the architectural complexity including cribriform pattern or back-to-back fusion of dysplastic glands. (B) Tubulovillous adenoma with low-grade dysplasia. Note the retained cellular polarity with pseudostratified, elongated nuclei. (C) Sessile serrated adenoma without dysplasia. Note the dilated base of crypts. (D) Traditional serrated adenoma. Note the deep-invaginated pattern of crypt serration with hyper eosinophilic cytoplasm and pencillated nuclei.

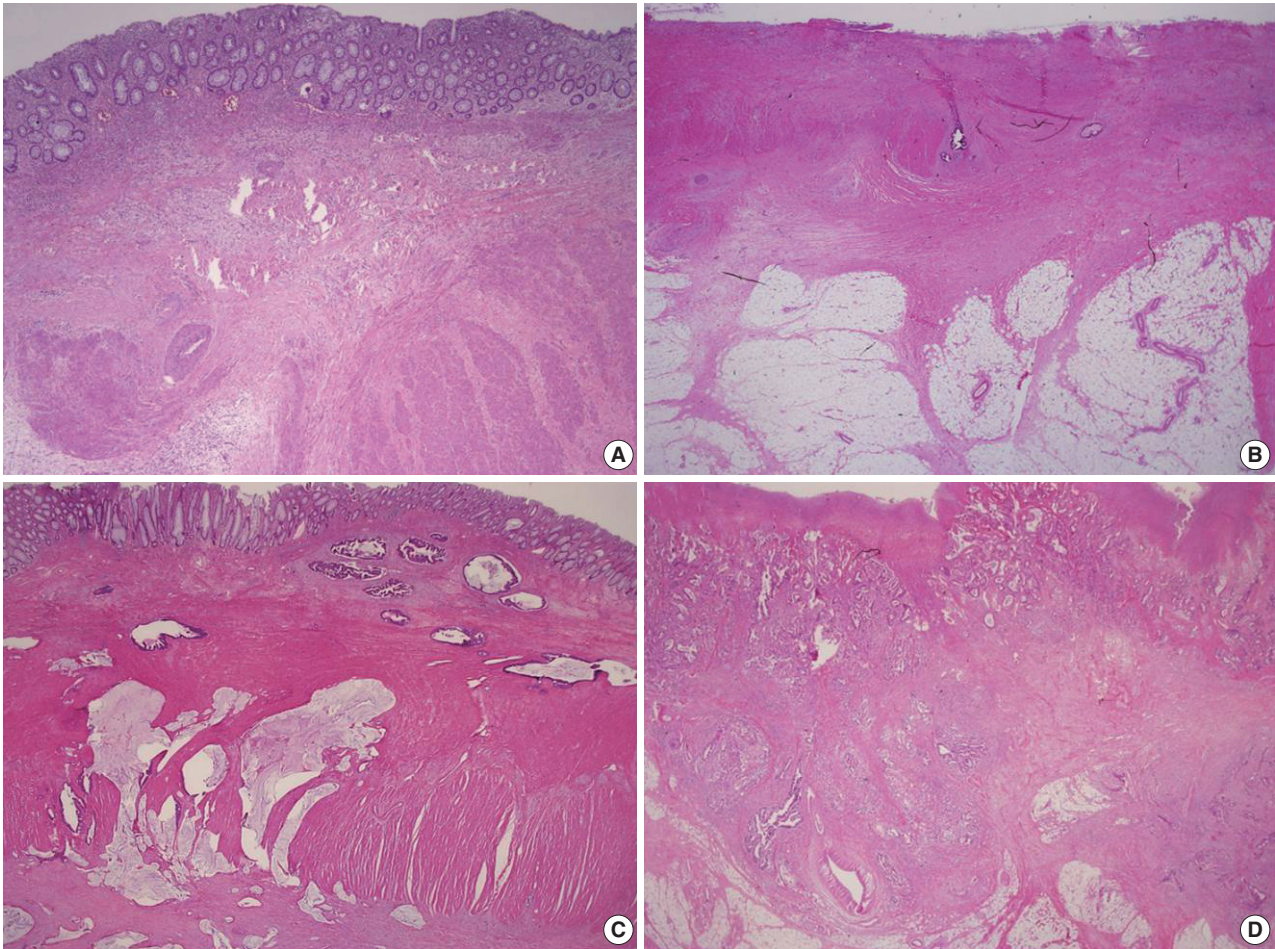

**Fig. 5.** Recommended tumor regression grading system. (A) Grade 0, complete response. No residual tumor cells are identified. (B) Grade 1, near complete response. The tumor bed contained abundant fibrosis with only a few or scattered tumor cells. (C) Grade 2, partial response. Residual tumor glands are easily identified in tumor bed. (D) Grade 3, poor or no response. The tumor cells do not demonstrate any response to chemoradiotherapy because abundant residual adenocarcinoma is present.



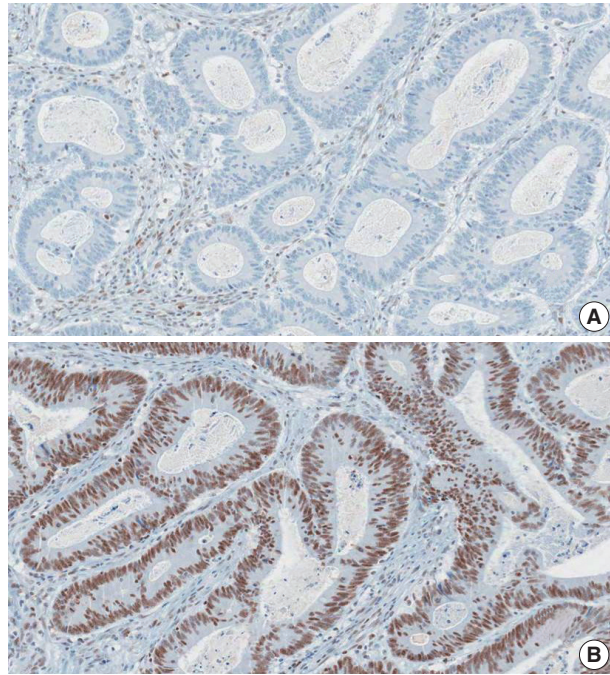

**Fig. 6.** A representative case of colorectal cancer with MMR deficiency (MLH1 deficiency). (A) MLH1 immunohistochemical staining showed negativity of nuclear expression in tumor cells. Note the retained nuclear expression in adjacent inflammatory cells. (B) MSH2 immunohistochemical staining demonstrated positivity of nuclear expression in tumor cells.
